# Supplementary material for: Neotropical Rattlesnake (Crotalus simus) Venom Pharmacokinetics in Lymph and Blood Using an Ovine Model
Source: MDPI journal article supplement (doi:10.3390/toxins12070455), 2020-07-17
Supplement: s1 [file s1]

# Supplementary Materials: Neotropical Rattlesnake (*Crotalus simus*) Venom Pharmacokinetics in Lymph and Blood Using an Ovine Model

Edgar Neri-Castro, Melisa Bénard-Valle, Dayanira Paniagua, Leslie V. Boyer, Lourival D. Possani, Fernando López-Casillas, Alejandro Olvera, Camilo Romero, Fernando Zamudio and Alejandro Alagón

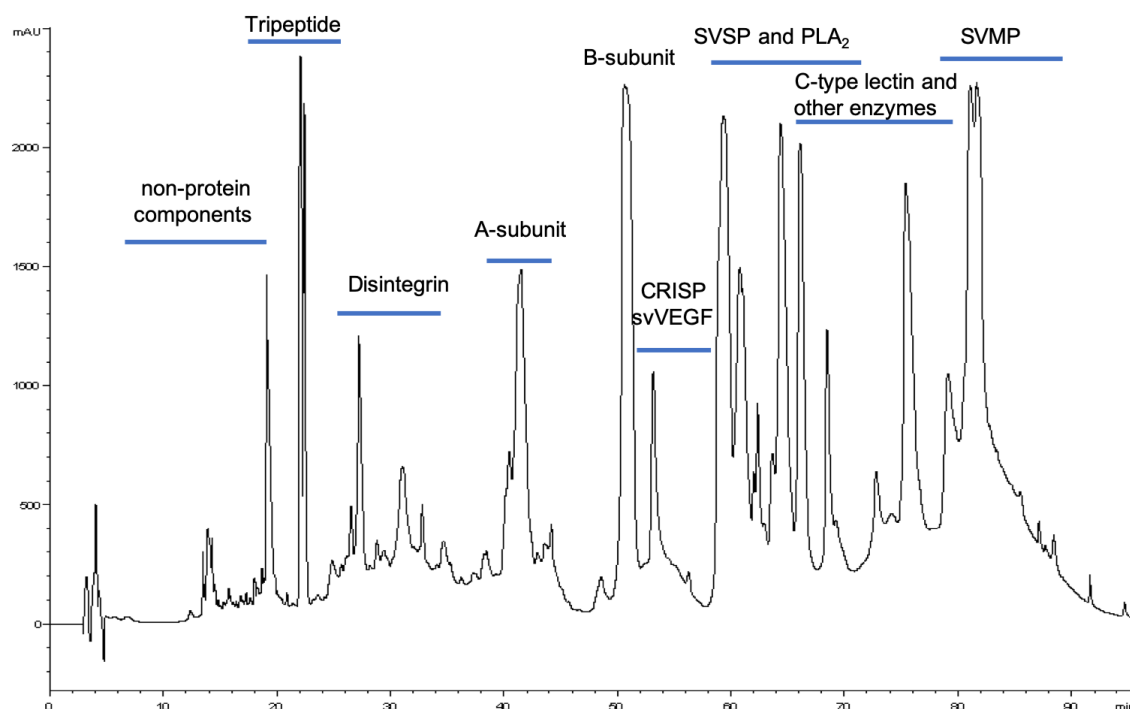

**Figure S1.** phase HPLC separation of the venom of *C. simus*. The assignment of protein families was made based on the reports of Castro *et al.* (2013) [4] and the results obtained in this study.

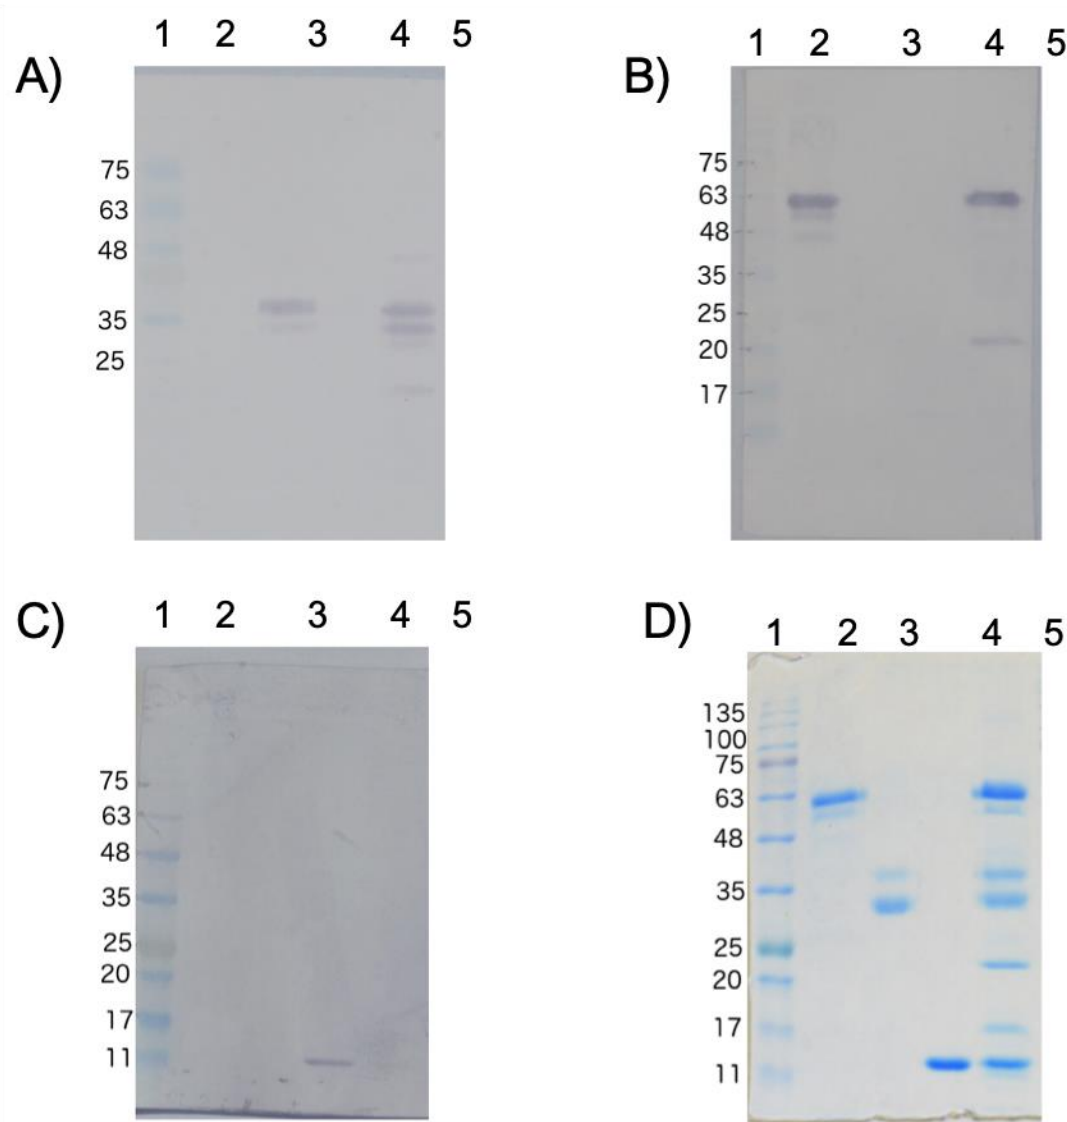

**Figure S2.** Western blot showing that the specific antibodies lack cross recognition against the other protein families. In each Western blot: lane 1, Standard molecular mass markers; 2, SVMPs; 3, SVSPs; 4, subunit B of crotoxin; 5, WV. For each of the fractions 2 µg per lane were analyzed, while for WV 3 µg were analyzed. **(A)** Shows the specific recognition of anti-SVSP antibodies to purified SVSPs and those in WV; **(B)** Shows the specific recognition of anti-SVMPs antibodies to purified SVMPs and those in WV; **(C)** Shows the specific recognition of monoclonal 4F6 antibody to purified subunit B of crotoxin and those in WV. **(D)** SDS-PAGE 12.5%, in lanes 2 to 4, 2 µg were analyzed and in lane 5, 20 µg.

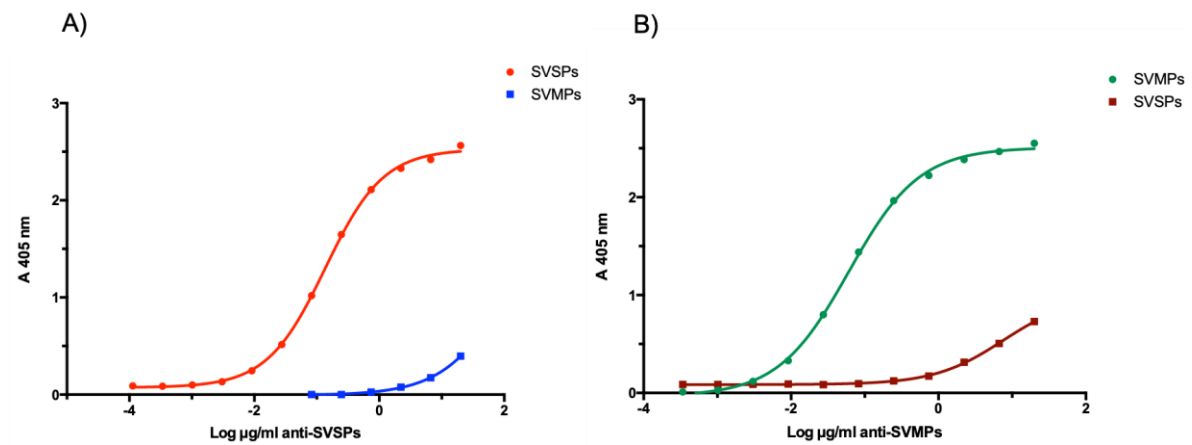

**Figure S3.** Level of recognition by ELISA of anti-SVSP (A) and anti-SVMP (B) antibodies to SVMPs and SVSPs.
